# Supplementary material for: Sesamin Promotes Osteoporotic Fracture Healing by Activating Chondrogenesis and Angiogenesis Pathways
Source: MDPI journal article supplement (doi:10.3390/nu14102106), 2022-05-18
Supplement: s1 [file s1]

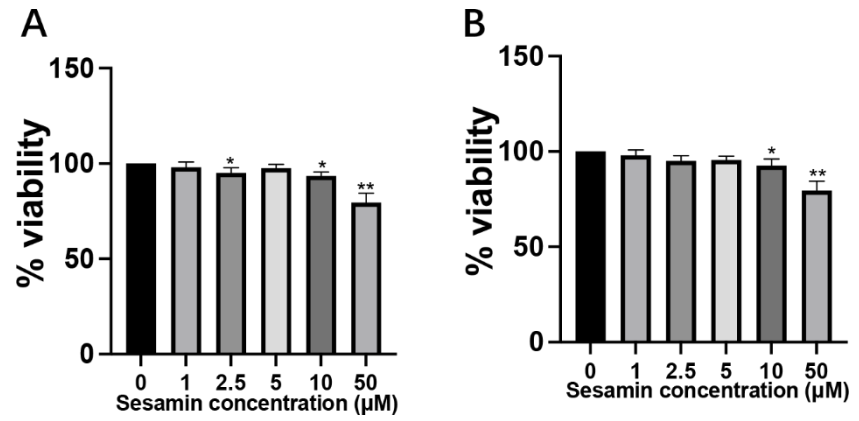

**Figure S1.** (A). Cytotoxicity assay of HUVECs by the treatment of sesamin at different concentration for 3 days ( $n = 6$ ; \*  $p < 0.05$ , \*\*  $p < 0.01$ ). (B). Cytotoxicity assay of BMSCs by the treatment of sesamin at different concentration for 3 days ( $n = 6$ ; \*  $p < 0.05$ , \*\*  $p < 0.01$ ).

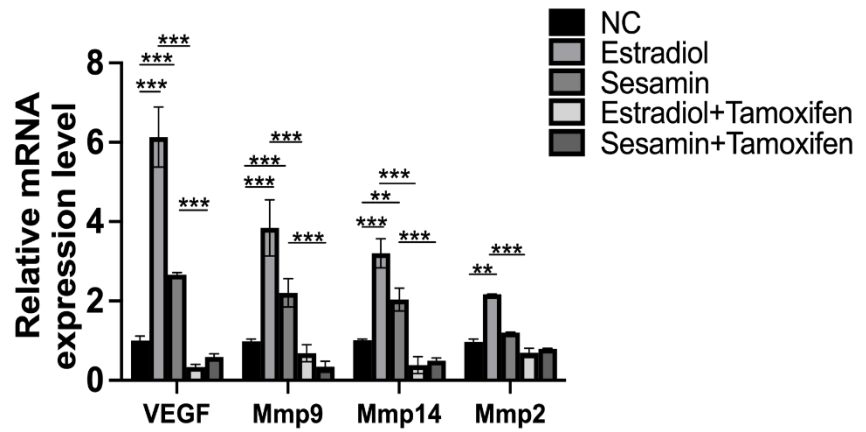

**Figure S2.** The mRNA expression level of angiogenesis markers in HUVECs treated with different combinations ( $n = 6$ ; \*  $p < 0.01$ , \*\*\*  $p < 0.001$ ).
